# Supplementary material for: A new species of baenid turtle from the Early Cretaceous Lakota Formation of South Dakota
Source: Copernicus journal article supplement (doi:10.5194/fr-23-1-2020), 2020-02-12
Supplement: Supplementary file [file fr-23-1-2020-supplement-title-page.pdf › fr-23-1-2020-supplement-title-page.pdf]

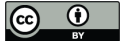

*Supplement of*

**A new species of baenid turtle from the Early Cretaceous Lakota Formation of South Dakota**

**Walter G. Joyce et al.**

*Correspondence to:* Walter G. Joyce ([walter.joyce@unifr.ch](mailto:walter.joyce@unifr.ch))

- `fr-23-1-2020-supplement-title-page.pdf`
- `Lakota_Matrix.nex`
- `__MACOSX`
  - `._Lakota_Matrix.nex`

The copyright of individual parts of the supplement might differ from the CC BY 4.0 License.
